# Supplementary material for: Is the Fine Root Tensile Strength Predictable from Structural and Morphological Traits across Mycorrhizal Types in Cool-Temperate Woody Species?
Source: MDPI journal article supplement (doi:10.3390/f14081542), 2023-07-28
Supplement: s1 [file s1]

## **Supplementary data**

### **Title**

**Is the fine root tensile strength predictable with their structure and morphology traits across mycorrhizal types in cool-temperate woody species?**

### **Author names**

Ruiqi Zeng, Kobayashi Makoto<sup>#</sup>

### **# Corresponding author**

Kobayashi Makoto

Nayoro Research Office, Field Science Center for Northern Biosphere, Hokkaido University, 250 Tokuda, Nayoro, Hokkaido 096-0016, Japan

Email: makoto@fsc.hokudai.ac.jp; Tel.: 09062163513

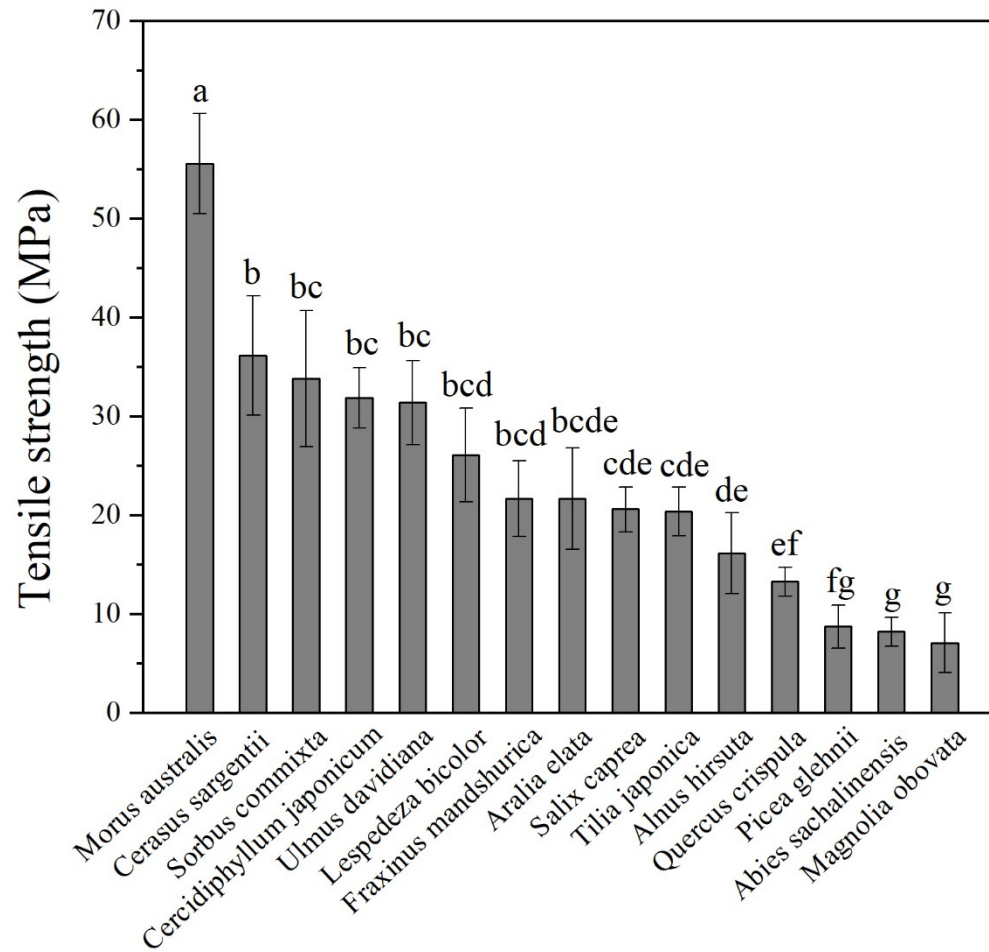

**Figure S1.** Fine root Tr (MPa) for 15 cool-temperate woody species in Hokkaido. Values are means  $\pm$  SEM. Different letters show statistically significant differences among the species (Duncan tests,  $P < 0.05$ ).

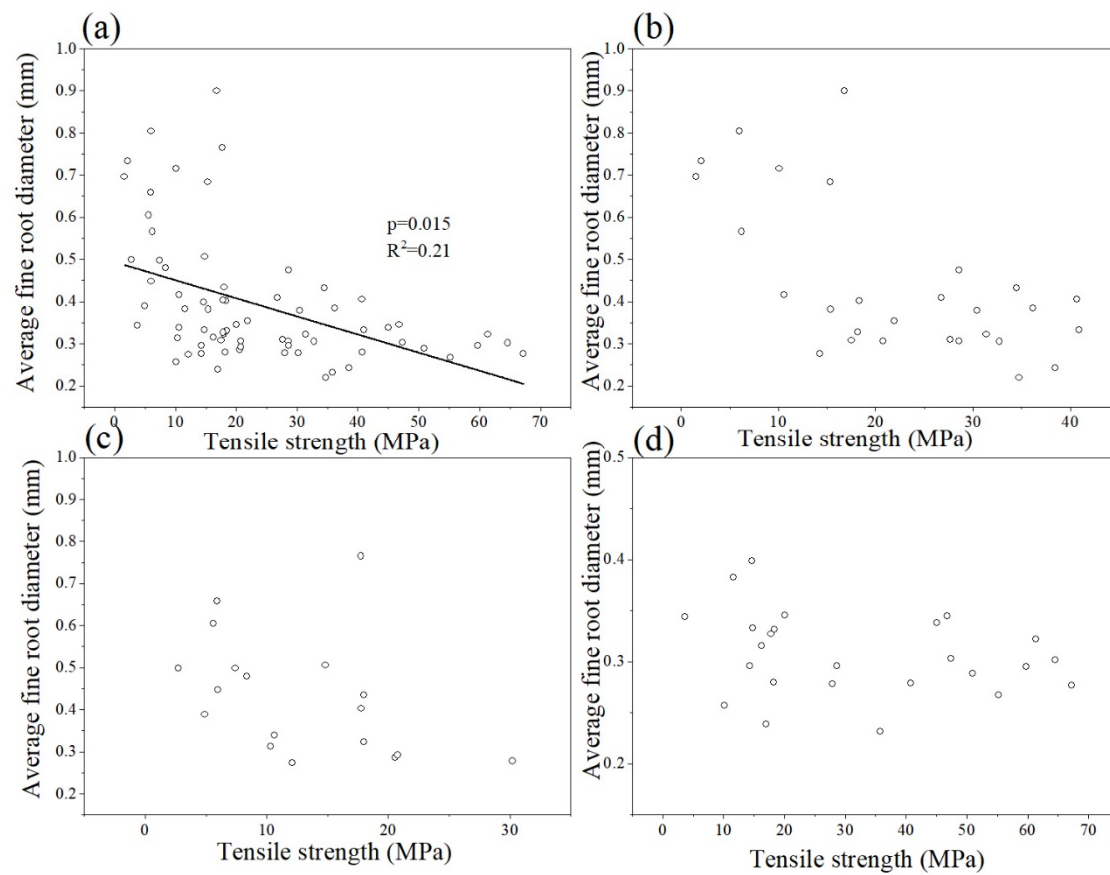

**Figure S2.** Relationships between fine root Tr and average fine root diameter of 15 species (a), AM species (b), EM species (c), and AEM species (d). The statistical significance for the relationship between the two parameters is shown as the  $p$  value based on the GLMM analysis.

**Table S1.** The values for functional traits of the 15 species studied. Values are mean. When letters differ, differences are significant between groups using a Duncan test ( $p<0.05$ ).

|                      | <b>Tensile<br/>strength<br/>(MPa)</b> | <b>Average<br/>fine root<br/>diameter<br/>(mm)</b> | <b>Root<br/>tissue<br/>density<br/>(g/cm<sup>3</sup>)</b> | <b>Total fine<br/>root<br/>biomass(g)</b> | <b>Maximum<br/>Root depth<br/>(cm)</b> | <b>Specific root<br/>length<br/>(cm/g)</b> |
|----------------------|---------------------------------------|----------------------------------------------------|-----------------------------------------------------------|-------------------------------------------|----------------------------------------|--------------------------------------------|
| AM species<br>group  | 22.37a                                | .42a                                               | .24b                                                      | 1.32a                                     | 8.61a                                  | 4102.65a                                   |
| EM species<br>group  | 12.88b                                | .42a                                               | .29b                                                      | .52b                                      | 8.65a                                  | 4817.84a                                   |
| AEM species<br>group | 32.32a                                | .31b                                               | .36a                                                      | .87a                                      | 8.64a                                  | 4178.7a                                    |

**Table S2.** Summary of the traits of 15 cool-temperate woody species in Hokkaido

| Species                    | N  | Average fine root diameter (mm) |     |                | Root tissue density(g/cm <sup>3</sup> ) |     |                | Total fine root biomass (g) |     |                | Maximum root depth(cm) |     |                | Specific root length(cm/g) |     |                | Tensile strength (MPa) |     |                |
|----------------------------|----|---------------------------------|-----|----------------|-----------------------------------------|-----|----------------|-----------------------------|-----|----------------|------------------------|-----|----------------|----------------------------|-----|----------------|------------------------|-----|----------------|
|                            |    | Ra                              | Me  | CV             | Ra                                      | Me  | CV             | Ra                          | Me  | CV             | Ra                     | Me  | CV             | Ran                        | Me  | CV             | Ra                     | Me  | CV             |
|                            |    | nge                             | an  | % <sup>1</sup> | nge                                     | an  | % <sup>1</sup> | nge                         | an  | % <sup>1</sup> | nge                    | an  | % <sup>1</sup> | ge                         | an  | % <sup>1</sup> | nge                    | an  | % <sup>1</sup> |
| EM species                 | 23 | .27-.77                         | .42 | 31.9           | .2-.4                                   | .29 | 36.03          | .13-1.35                    | .52 | 65.81          | 5-23                   | 8.6 | 48.11          | 1133.52-2328               | 481 | 124            | 2.7-44.30.             | 12. | 58.58          |
| <i>Abies sachalinensis</i> | 5  | .4-.77                          | .57 | 22.93          | .2-.45                                  | .23 | 61.84          | .31-.95                     | .56 | 50.04          | 5-14                   | 8   | 42.57          | 1133.52-2328               | 516 | 172            | 5.6-17.73              | 10. | 54.29          |
| <i>Picea glehnii</i>       | 6  | .39-.5                          | .44 | 9.56           | .03-.37                                 | .28 | 46.64          | .13-1.35                    | .57 | 75.84          | 5-9                    | 6.5 | 23.33          | 1515.38-2311               | 558 | 154            | 2.7-17.78              | 7.8 | 85.96          |
| <i>Quercus crispula</i>    | 6  | .27-.48                         | .36 | 23.32          | .26-.39                                 | .35 | 12.49          | .15-.36                     | .25 | 33.95          | 5-10                   | 7.8 | 26.06          | 1942.07-4593               | 322 | 32.            | 8.3-20.79              | 13. | 36.70          |
| <i>Tilia japonica</i>      | 6  | .28-.32                         | .3  | 7.07           | .25-.4                                  | .32 | 20.69          | .4-1.21                     | .75 | 44.42          | 7-23                   | 11. | 53.82          | 3274.87-6373               | 479 | 25.            | 17.96-30.83            | 22. | 28.17          |

|                                                  |    |         |     |       |         |     |       |           |      |       |       |       |       |                 |         |       |             |       |       |
|--------------------------------------------------|----|---------|-----|-------|---------|-----|-------|-----------|------|-------|-------|-------|-------|-----------------|---------|-------|-------------|-------|-------|
| AM species                                       | 33 | .22-.9  | .42 | 42.05 | .06-.44 | .24 | 41.92 | .10-2.89  | 1.32 | 70.96 | 4-12  | 8.61  | 26.46 | 1742.56-8791.45 | 4102.65 | 43.86 | 1.57-40.92  | 22.37 | 52.48 |
| <i>Aralia elata</i>                              | 3  | .28-.9  | .49 | 71.27 | .06-.35 | .25 | 65.53 | .12-.34   | .2   | 62.37 | 5-7   | 6     | 16.67 | 2617.43-4816.36 | 3856.7  | 29.19 | 14.27-16.78 | 17.28 | 19.03 |
| <i>Cercidiphyllum japonicum</i>                  | 6  | .31-.43 | .38 | 12.56 | .16-.38 | .27 | 30.19 | 1.52-2.89 | 2.07 | 28.59 | 8-12  | 9.33  | 16.13 | 2014.05-6623.45 | 3716.53 | 45.28 | 26.76-40.92 | 34.44 | 17.85 |
| <i>Fraxinus mandshurica</i> var. <i>Japonica</i> | 6  | .33-.48 | .4  | 12.27 | .12-.23 | .18 | 20.74 | 1.43-2.68 | 2.04 | 24.34 | 8-12  | 10.33 | 13.22 | 3185.42-5841.26 | 4639.66 | 19.75 | 10.62-30.42 | 20.24 | 30.09 |
| <i>Ulmus davidiana</i> var. <i>japonica</i>      | 6  | .22-.32 | .28 | 13.53 | .35-.44 | .38 | 8.41  | 1.42-5    | 1.89 | 29.69 | 10-11 | 10.33 | 5.00  | 3382.66-7591.76 | 4481.27 | 35.53 | 28.55-38.48 | 30.80 | 22.83 |
| <i>Lespedeza</i>                                 | 6  | .24-.31 | .31 | 12.   | .17-.25 | .25 | 24.   | .21-.85   | .85  | 94.   | 5-8.1 | 28.   | 3727  | 579             | 36.     | 17.   | 28.         | 33.   |       |

|                 |    |      |     |     |      |     |     |      |     |     |     |     |     |      |      |     |     |     |     |
|-----------------|----|------|-----|-----|------|-----|-----|------|-----|-----|-----|-----|-----|------|------|-----|-----|-----|-----|
| <i>za</i>       |    | .35  |     | 83  | .33  |     | 93  | 2.3  |     | 06  | 12  | 7   | 37  | .24- | 9.91 | 23  | 62- | 33  | 24  |
| <i>bicolor</i>  |    |      |     |     |      |     |     | 4    |     |     |     |     |     | 8791 |      |     | 34. |     |     |
|                 |    |      |     |     |      |     |     |      |     |     |     |     |     | .45  |      |     | 74  |     |     |
| <i>Magnol</i>   | 6  | .57- | .7  | 11. | .11- | .13 | 15. | .1-. | .29 | 66. | 4-9 | 6.1 | 31. | 1742 | 199  | 15. | 1.5 | 6.8 | 75. |
| <i>ia</i>       |    | 0.8  |     | 15  | .16  |     | 49  | 64   |     | 71  |     | 7   | 47  | .56- | 8.86 | 27  | 7-  | 8   | 05  |
| <i>obovata</i>  |    |      |     |     |      |     |     |      |     |     |     |     |     | 2520 |      |     | 15. |     |     |
|                 |    |      |     |     |      |     |     |      |     |     |     |     |     | .51  |      |     | 30  |     |     |
| AEM             | 28 | .23- | .31 | 14. | .2-  | .36 | 23. | .17- | .87 | 65. | 5-  | 8.6 | 32. | 1765 | 417  | 38. | 3.6 | 32. | 61. |
| species         |    | .4   |     | 02  | .53  |     | 61  | 3.0  |     | 75  | 15  | 4   | 61  | .89- | 8.7  | 52  | 8-  | 32  | 18  |
|                 |    |      |     |     |      |     |     | 6    |     |     |     |     |     | 7359 |      |     | 67. |     |     |
|                 |    |      |     |     |      |     |     |      |     |     |     |     |     | .99  |      |     | 23  |     |     |
| <i>Alnus</i>    | 6  | .24- | .34 | 16. | .29- | .38 | 26. | .17- | .61 | 68. | 8-  | 10. | 22. | 2041 | 317  | 31. | 3.6 | 18. | 87. |
| <i>hirsuta</i>  |    | .4   |     | 68  | .53  |     | 31  | 1.3  |     | 18  | 14  | 5   | 34  | .6-  | 6.35 | 24  | 8-  | 75  | 85  |
|                 |    |      |     |     |      |     |     | 5    |     |     |     |     |     | 4696 |      |     | 46. |     |     |
|                 |    |      |     |     |      |     |     |      |     |     |     |     |     | .05  |      |     | 82  |     |     |
| <i>Cerasu</i>   | 6  | .26- | .29 | 10. | .23- | .37 | 18. | .54- | .85 | 26. | 6-  | 8.1 | 26. | 2604 | 433  | 34. | 10. | 35. | 63. |
| <i>s</i>        |    | .35  |     | 3   | .43  |     | 96  | 1.1  |     | 42  | 12  | 7   | 17  | .84- | 3.19 | 14  | 09- | 61  | 82  |
| <i>sargent</i>  |    |      |     |     |      |     |     | 1    |     |     |     |     |     | 7023 |      |     | 67. |     |     |
| <i>ii</i>       |    |      |     |     |      |     |     |      |     |     |     |     |     | .75  |      |     | 23  |     |     |
| <i>Morus</i>    | 6  | .27- | .29 | 5.3 | .27- | .3  | 8.6 | .77- | 1.3 | 62. | 7-  | 10. | 32. | 4161 | 524  | 17. | 40. | 51. | 17. |
| <i>australi</i> |    | .3   |     | 9   | .33  |     | 7   | 3.0  | 7   | 74  | 15  | 67  | 3   | .85- | 8.05 | 22  | 76- | 77  | 2   |
| <i>s</i>        |    |      |     |     |      |     |     | 6    |     |     |     |     |     | 6157 |      |     | 64. |     |     |
|                 |    |      |     |     |      |     |     |      |     |     |     |     |     | .6   |      |     | 58  |     |     |
| <i>Salix</i>    | 4  | .23- | .28 | 12. | .2-  | .28 | 21. | .22- | .4  | 46. | 6-7 | 6.2 | 8   | 4021 | 605  | 25. | 14. | 21. | 46. |
| <i>caprea</i>   |    | .32  |     | 82  | .33  |     | 3   | .65  |     | 51  |     | 5   |     | .89- | 3.78 | 92  | 27- | 11  | 90  |
|                 |    |      |     |     |      |     |     |      |     |     |     |     |     | 7359 |      |     | 35. |     |     |

|               |   |      |     |     |      |     |     |      |     |     |    |     |     |      |      |     |     |     |     |
|---------------|---|------|-----|-----|------|-----|-----|------|-----|-----|----|-----|-----|------|------|-----|-----|-----|-----|
|               |   |      |     |     |      |     |     |      |     |     |    |     |     | .99  |      |     | 77  |     |     |
| <i>Sorbus</i> | 6 | .32- | .34 | 8.2 | .31- | .42 | 19. | .42- | .99 | 47. | 5- | 6.8 | 25. | 1765 | 270  | 26. | 14. | 31. | 65. |
| <i>commi</i>  |   | .4   |     | 3   | .53  |     | 66  | 1.6  |     | 6   | 10 | 3   | 2   | .89- | 7.17 | 33  | 63- | 44  | 91  |
| <i>xta</i>    |   |      |     |     |      |     |     | 3    |     |     |    |     |     | 3645 |      |     | 61. |     |     |
|               |   |      |     |     |      |     |     |      |     |     |    |     |     | .21  |      |     | 36  |     |     |

---

<sup>1</sup>CV%, the coefficient of variation.
